# Supplementary material for: Functionalized, Vertically Super-Aligned Multiwalled Carbon Nanotubes for Potential Biomedical Applications
Source: Int J Mol Sci. 2020 Mar 25;21(7):2276. doi: 10.3390/ijms21072276 (PMC7178230; doi:10.3390/ijms21072276)
Supplement: Supplementary file 1 [file ijms-21-02276-s001.pdf]

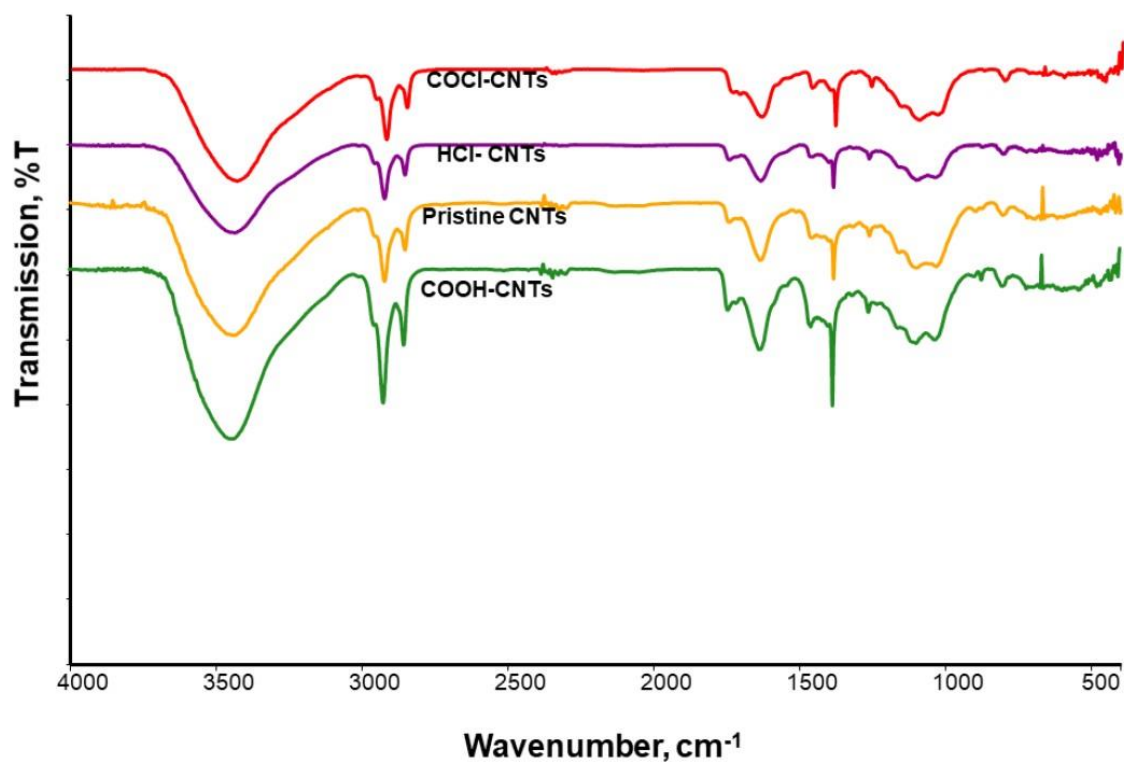

**Figure S1.** IR spectra of functionalised MWCNTs collected from KBr pellets.

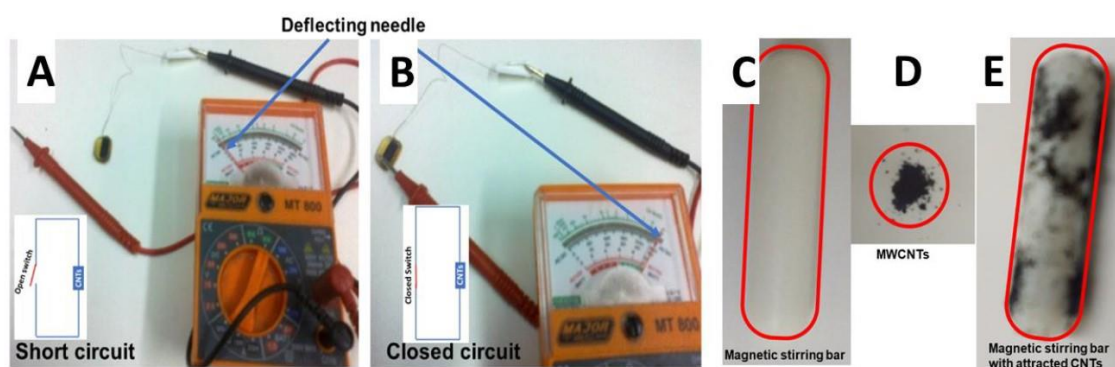

**Figure S2.** Magnetic properties of MWCNTs. Conducting meter with open (A) and closed circuit (B). Magnetic stirring bar (C). MWCNTs (D). Magnetic stirring bar attracting MWCNTs (E).

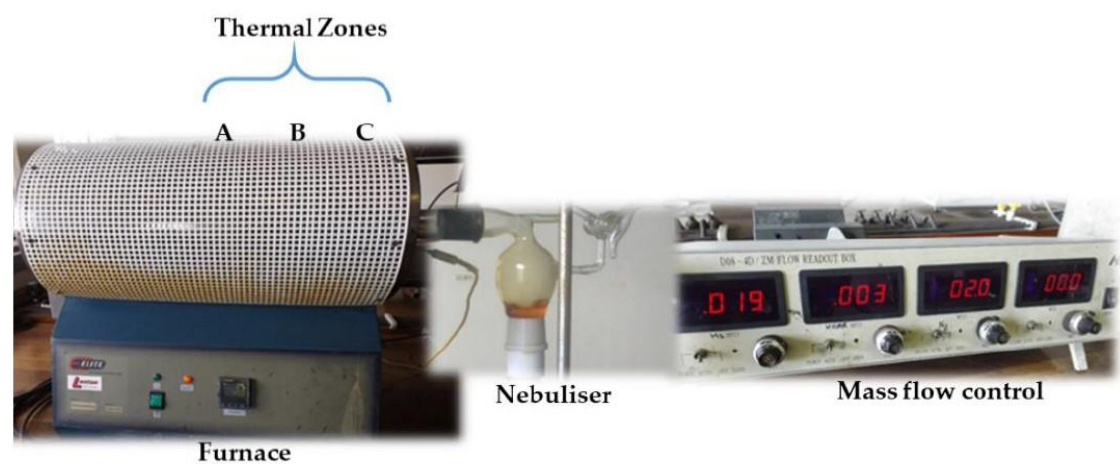

Figure S3. CVD set-up of the synthesis of VA-MWCNTs.

Table S1. BBDOE (A) Silicon Wafer and (B) Quartz Tube walls.

| A.                                                |                 |                                    |                                      |                                       |
|---------------------------------------------------|-----------------|------------------------------------|--------------------------------------|---------------------------------------|
| Optimal<br>D                                      | Hi<br>Cur<br>Lo | Reaction<br>60.0<br>[45.0]<br>30.0 | Carrier<br>600.0<br>[400.0]<br>200.0 | Reaction<br>900.0<br>[775.0]<br>650.0 |
| 0.99156                                           |                 |                                    |                                      |                                       |
| Wafer ma<br>Maximum<br>y = 11.80<br>d = 1.0000    |                 |                                    |                                      |                                       |
| Wafer le<br>Maximum<br>y = 270.3333<br>d = 1.0000 |                 |                                    |                                      |                                       |
| Wafer in<br>Maximum<br>y = 9.6667<br>d = 1.0000   |                 |                                    |                                      |                                       |
| Wafer ex<br>Maximum<br>y = 39.6667<br>d = 0.96667 |                 |                                    |                                      |                                       |

| B.                                                |                 |                                    |                                      |                                       |
|---------------------------------------------------|-----------------|------------------------------------|--------------------------------------|---------------------------------------|
| Optimal<br>D                                      | Hi<br>Cur<br>Lo | Reaction<br>60.0<br>[60.0]<br>30.0 | Carrier<br>600.0<br>[200.0]<br>200.0 | Reaction<br>900.0<br>[900.0]<br>650.0 |
| 1.0000                                            |                 |                                    |                                      |                                       |
| QT mass<br>Maximum<br>y = 1446.9458<br>d = 1.0000 |                 |                                    |                                      |                                       |
| QT lengt<br>Maximum<br>y = 181.8333<br>d = 1.0000 |                 |                                    |                                      |                                       |
| QT int d<br>Maximum<br>y = 12.1250<br>d = 1.0000  |                 |                                    |                                      |                                       |
| QT ext d<br>Maximum<br>y = 45.1667<br>d = 1.0000  |                 |                                    |                                      |                                       |
